# Supplementary material for: Function of phosphorylation of NF-kB p65 ser536 in prostate cancer oncogenesis
Source: PubMed Central journal article supplement (PMC4467437; doi:10.18632/oncotarget.3366), 2015-01-31
Supplement: oncotarget-06-6281-s001.pdf [file oncotarget-06-6281-s001.pdf]

## Function of phosphorylation of NF-kB p65 ser536 in prostate cancer oncogenesis

### Supplementary Material

**STable 1: Oligonucleotide primer sequences and reaction condition for real-time PCR**

| Primer name   | primer sequence                        | Annealing Temperatures |
|---------------|----------------------------------------|------------------------|
| WFDC2 RTF     | 5'-CGGCTTCACCCTAGTCTCAG-3'             | 60 <sup>0</sup> C      |
| WFDC2 RTR     | 5'-GGGCAGGAACCCTCCTTATC-3'             |                        |
| IFI27 RTF     | 5'-CTCTGCCCGGTGTTTTTGTT-3'             | 60 <sup>0</sup> C      |
| IFI27 RTR     | 5'-CTTTGGCCACACTGGTCACT-3'             |                        |
| LCN2 RTF      | 5'-GTGGTATGTGGTAGGCCTGG-3'             | 60 <sup>0</sup> C      |
| LCN2 RTR      | 5'-CACCACTCGGACGAGGTAAC-3'             |                        |
| Cyclin D1 RTF | 5'- CCGTCCATGCGGAAGATC-3'              | 60 <sup>0</sup> C      |
| Cyclin D1 RTR | 5'-GAAGACCTCCTCCTCGCACT-3'             |                        |
| MMP-9 RTF     | 5'- GAGGCGCTCATGTACCCTATGT-3'          | 60 <sup>0</sup> C      |
| MMP-9 RTR     | 5'- CCGTGGCTCAGGTTTCAGG-3'             |                        |
| IL8 RTF       | 5'- CTT GGC AGC CTT CCT GAT TT -3'     | 60 <sup>0</sup> C      |
| IL8RTR        | 5'- TTC TTT AGC ACT CCT TGG CAA AA -3' |                        |
